# Supplementary figures and images for: Nogo Receptor Signaling Restricts Adult Neural Plasticity by Limiting Synaptic AMPA Receptor Delivery
Source: PubMed Central journal article supplement — Cereb Cortex. 2015 Oct 15;26(1):427–39. doi: 10.1093/cercor/bhv232 (PMC4677985; doi:10.1093/cercor/bhv232), 2015-10-15

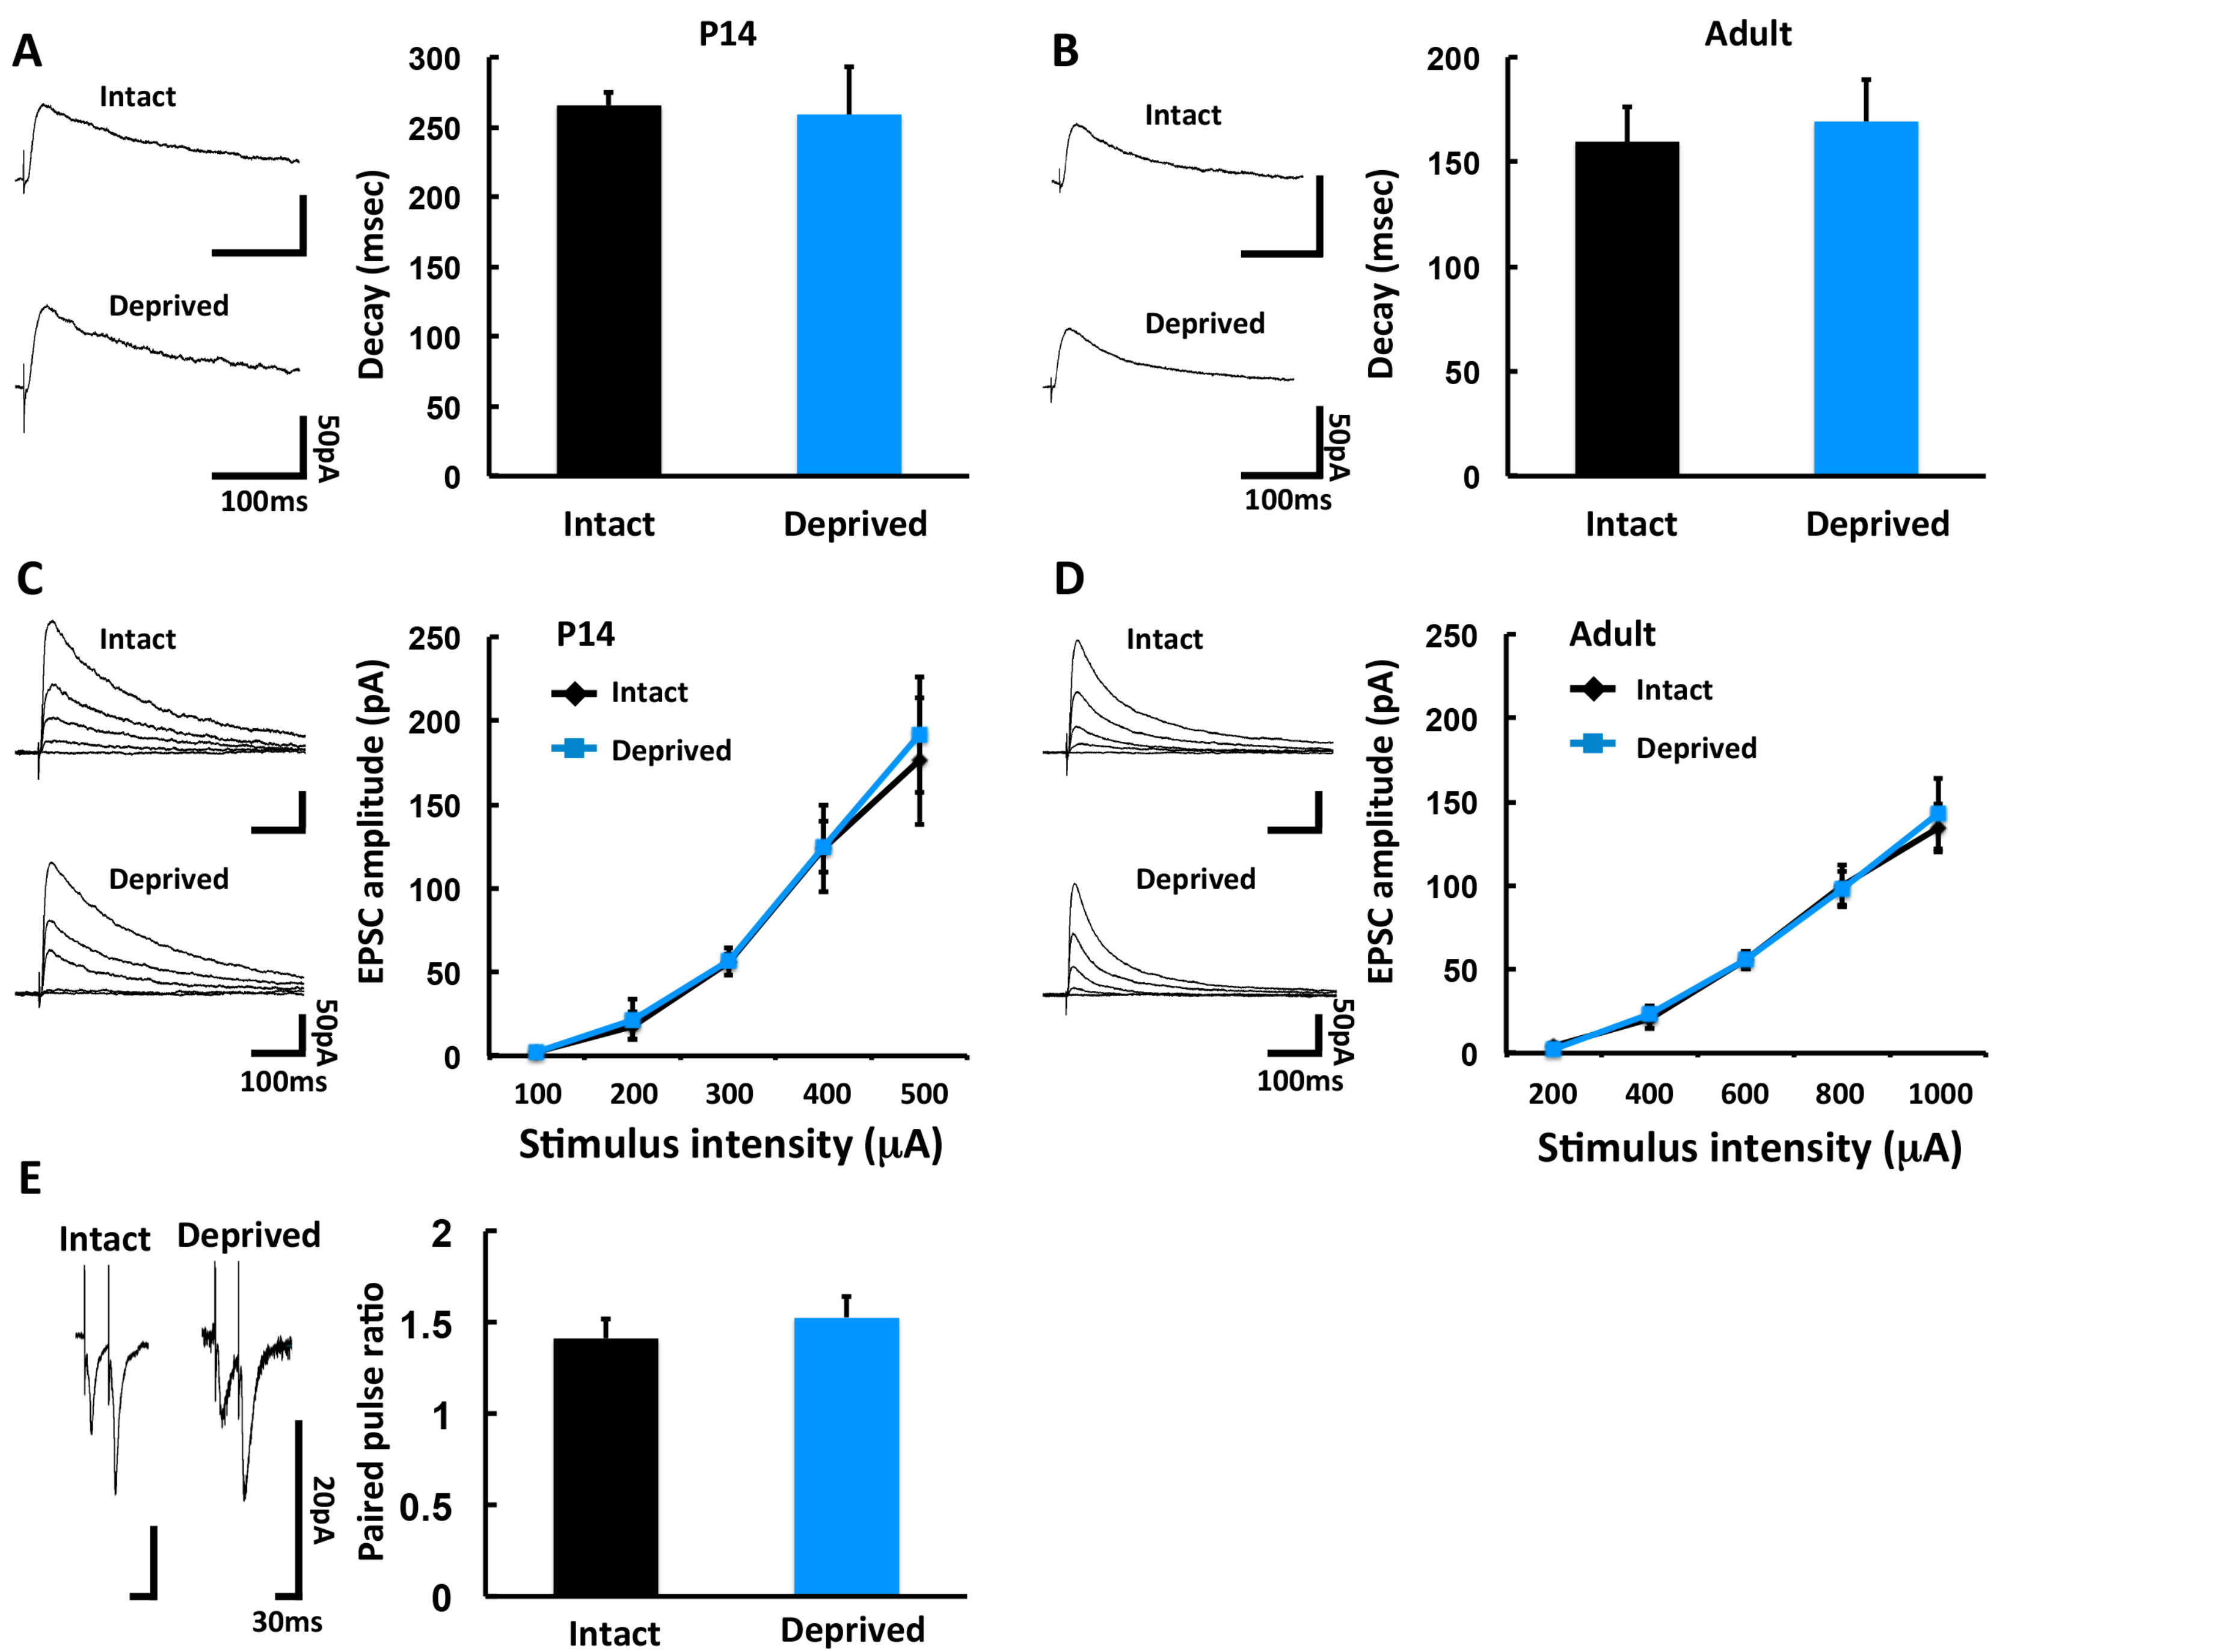

FigureS1

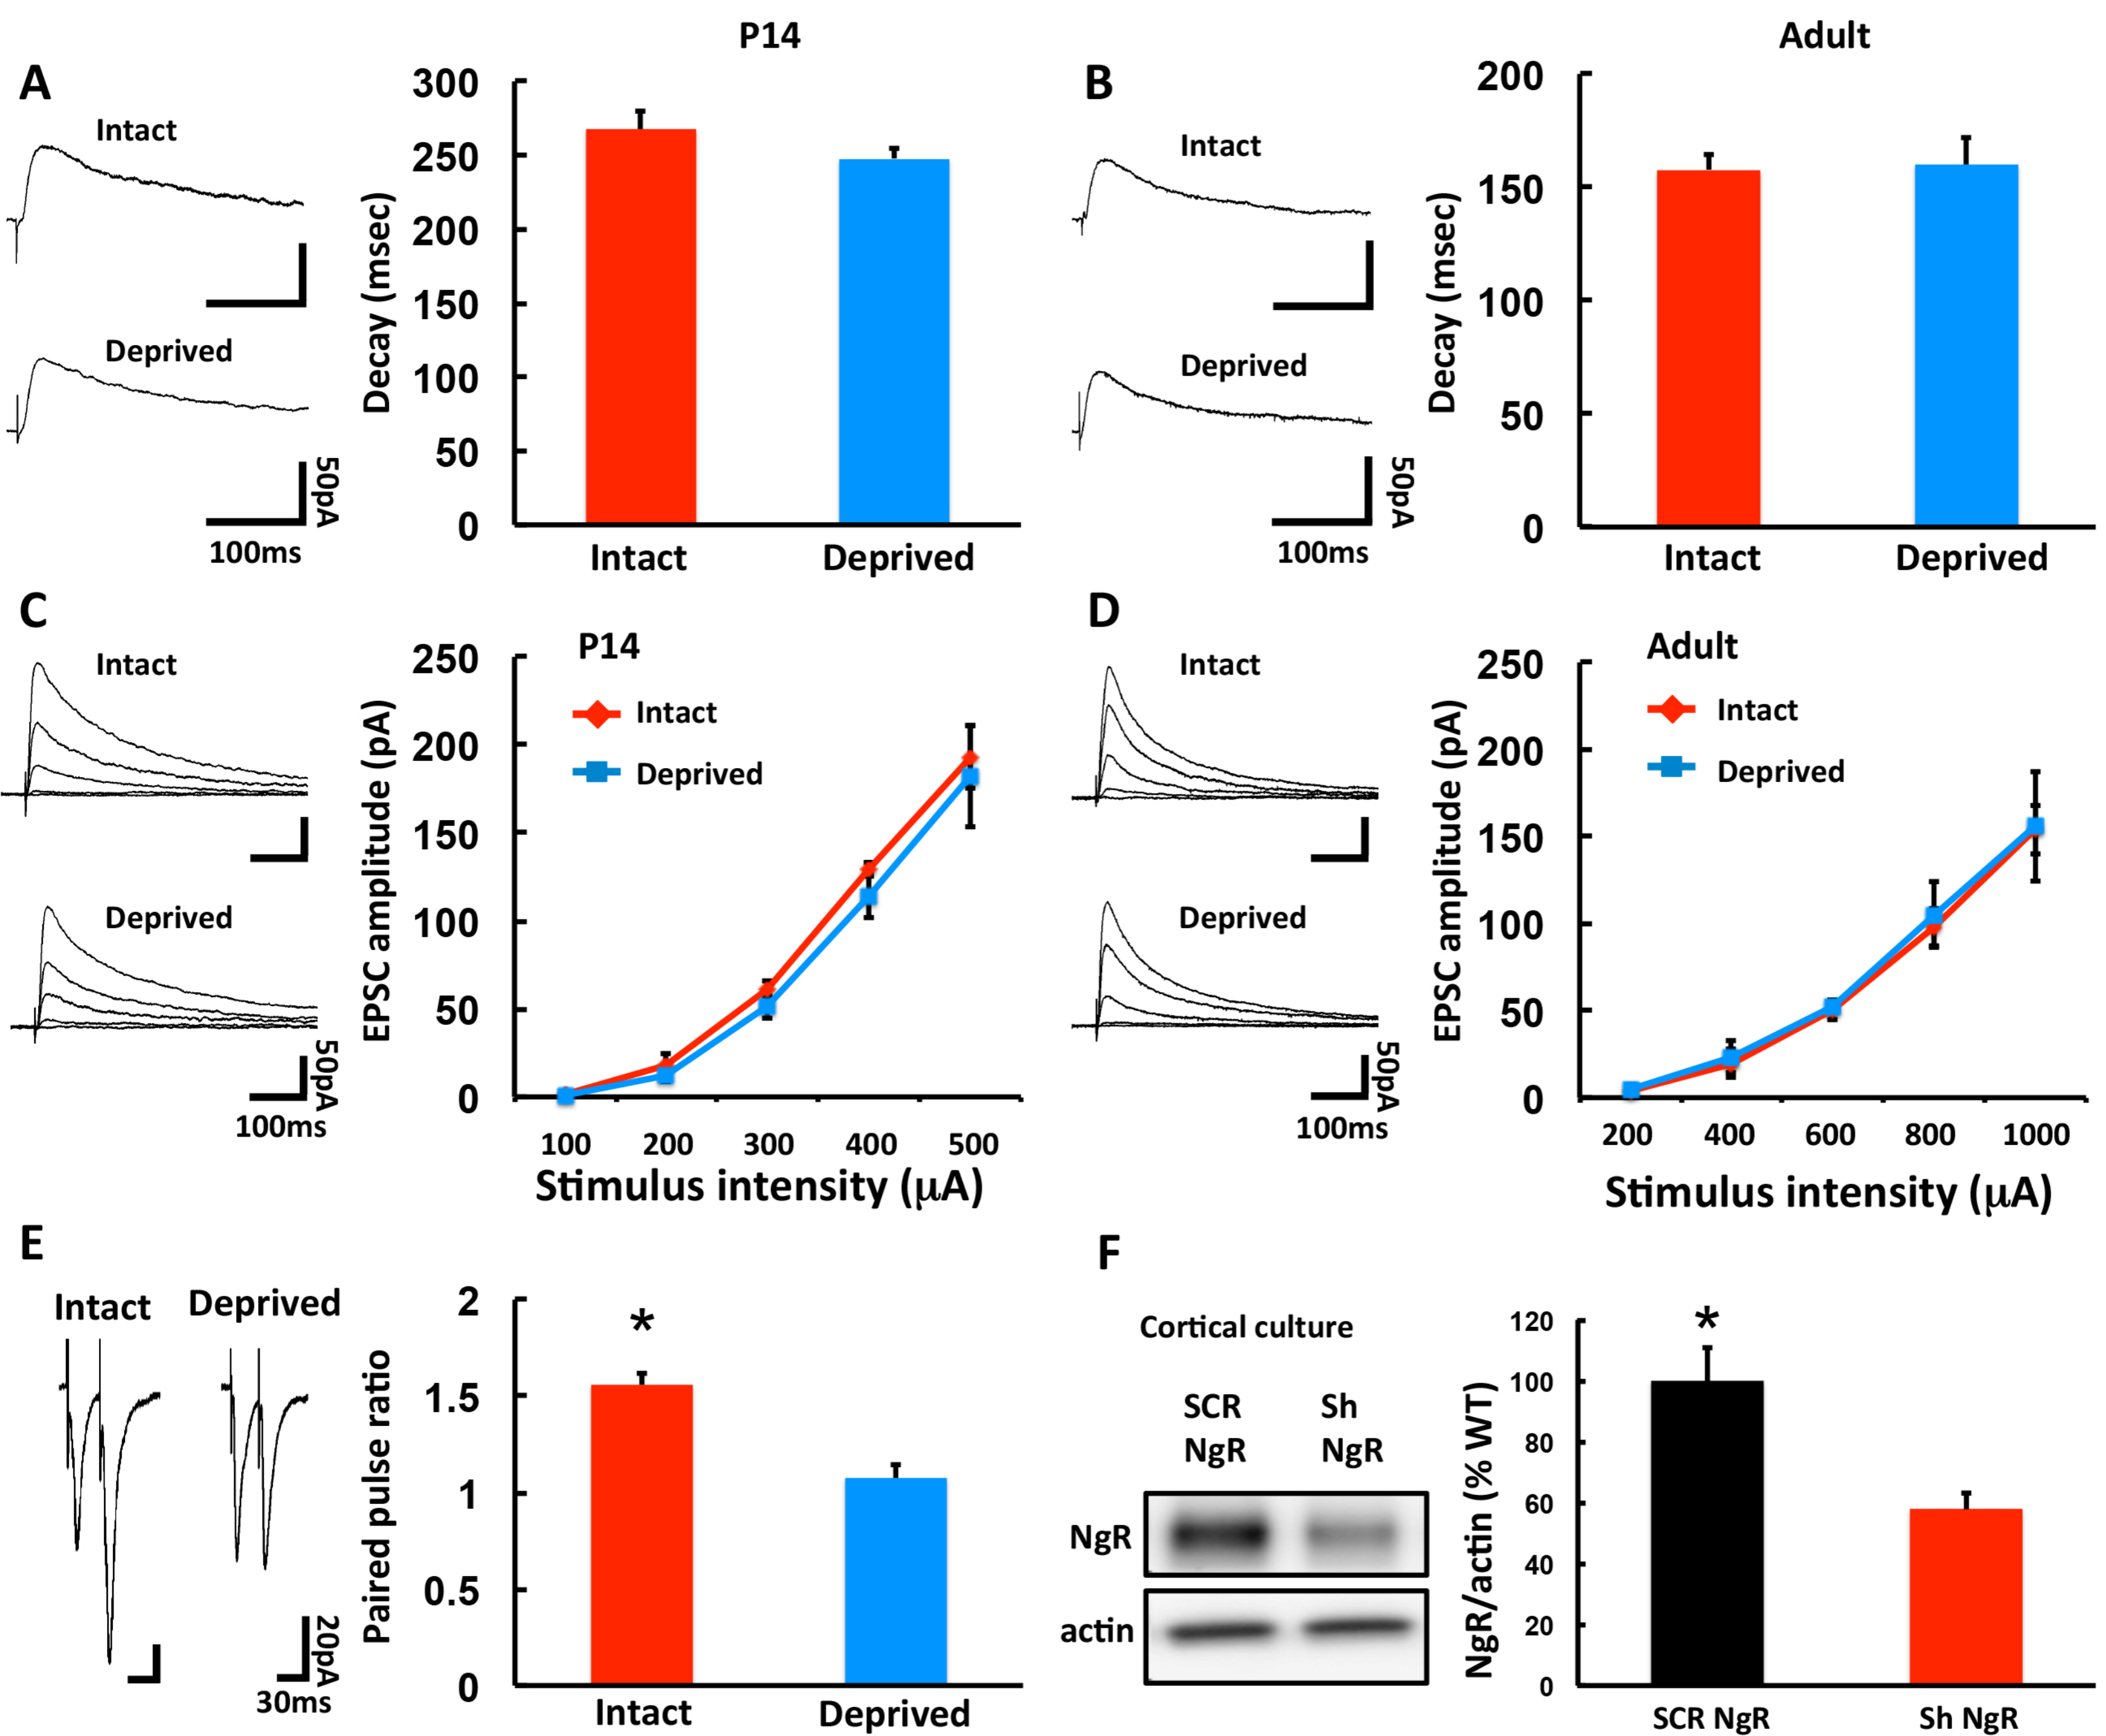

FigureS2

**A****Cortical culture**

SCR Troy      Sh Troy

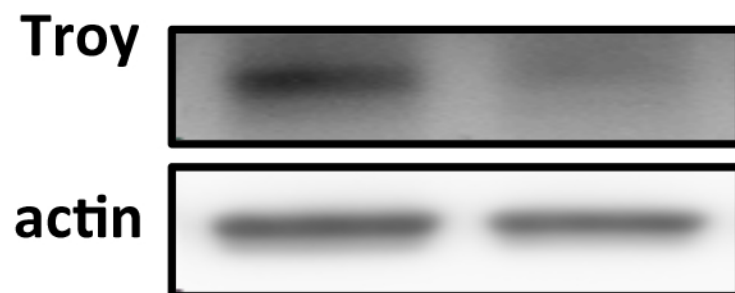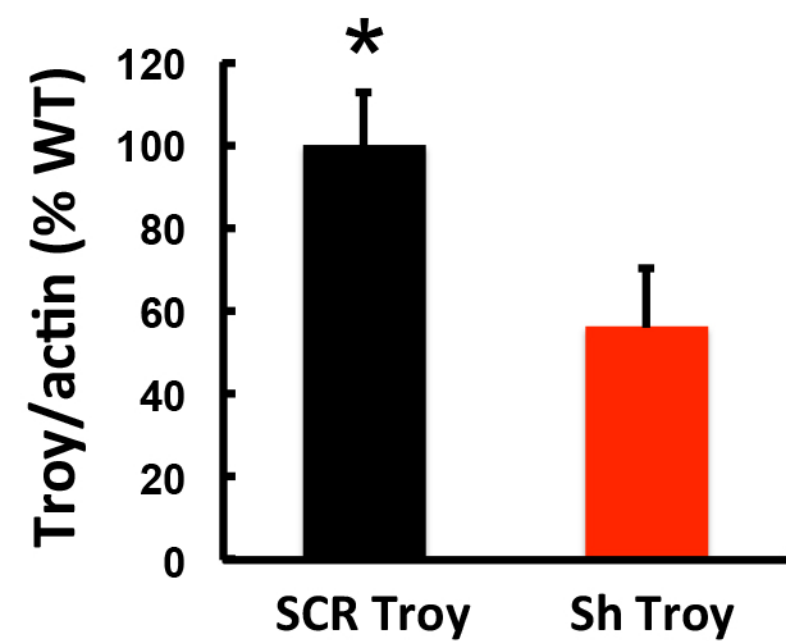**B****WT**

Crude      Syn

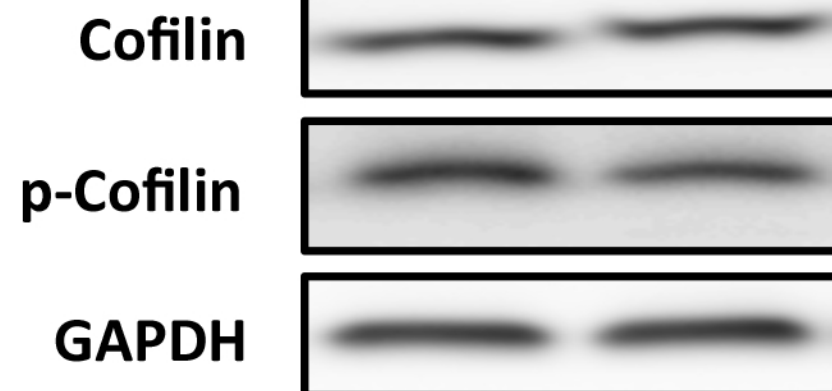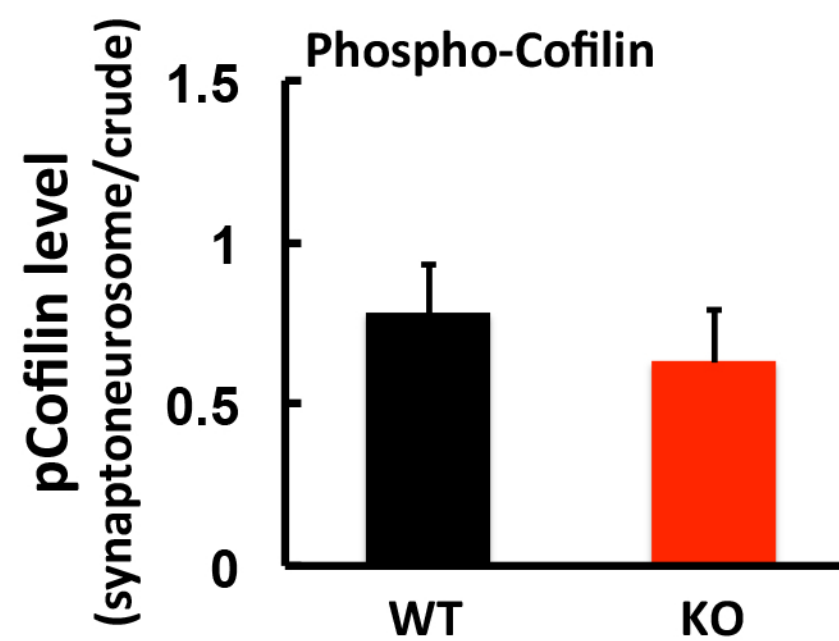**KO**

Crude      Syn

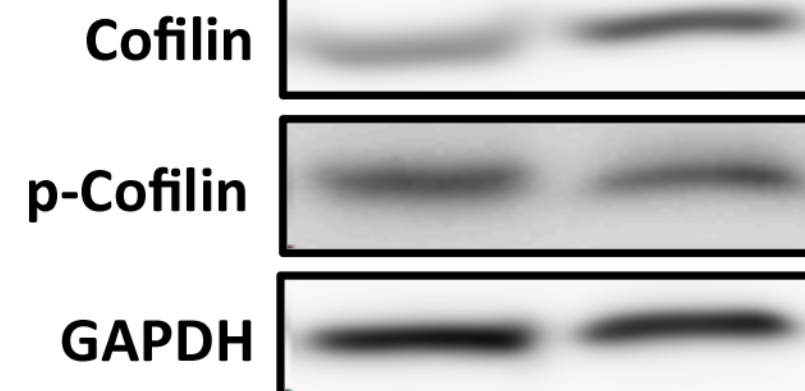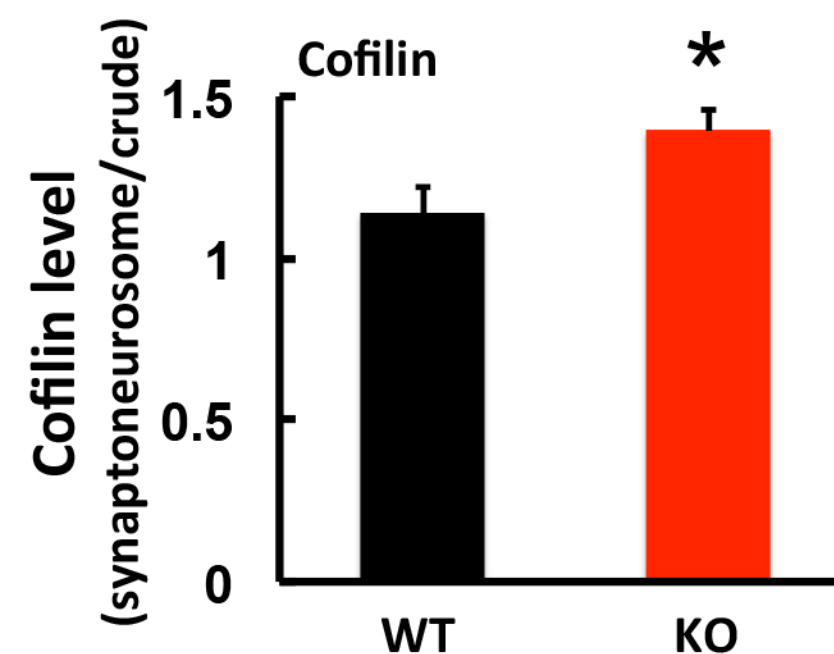

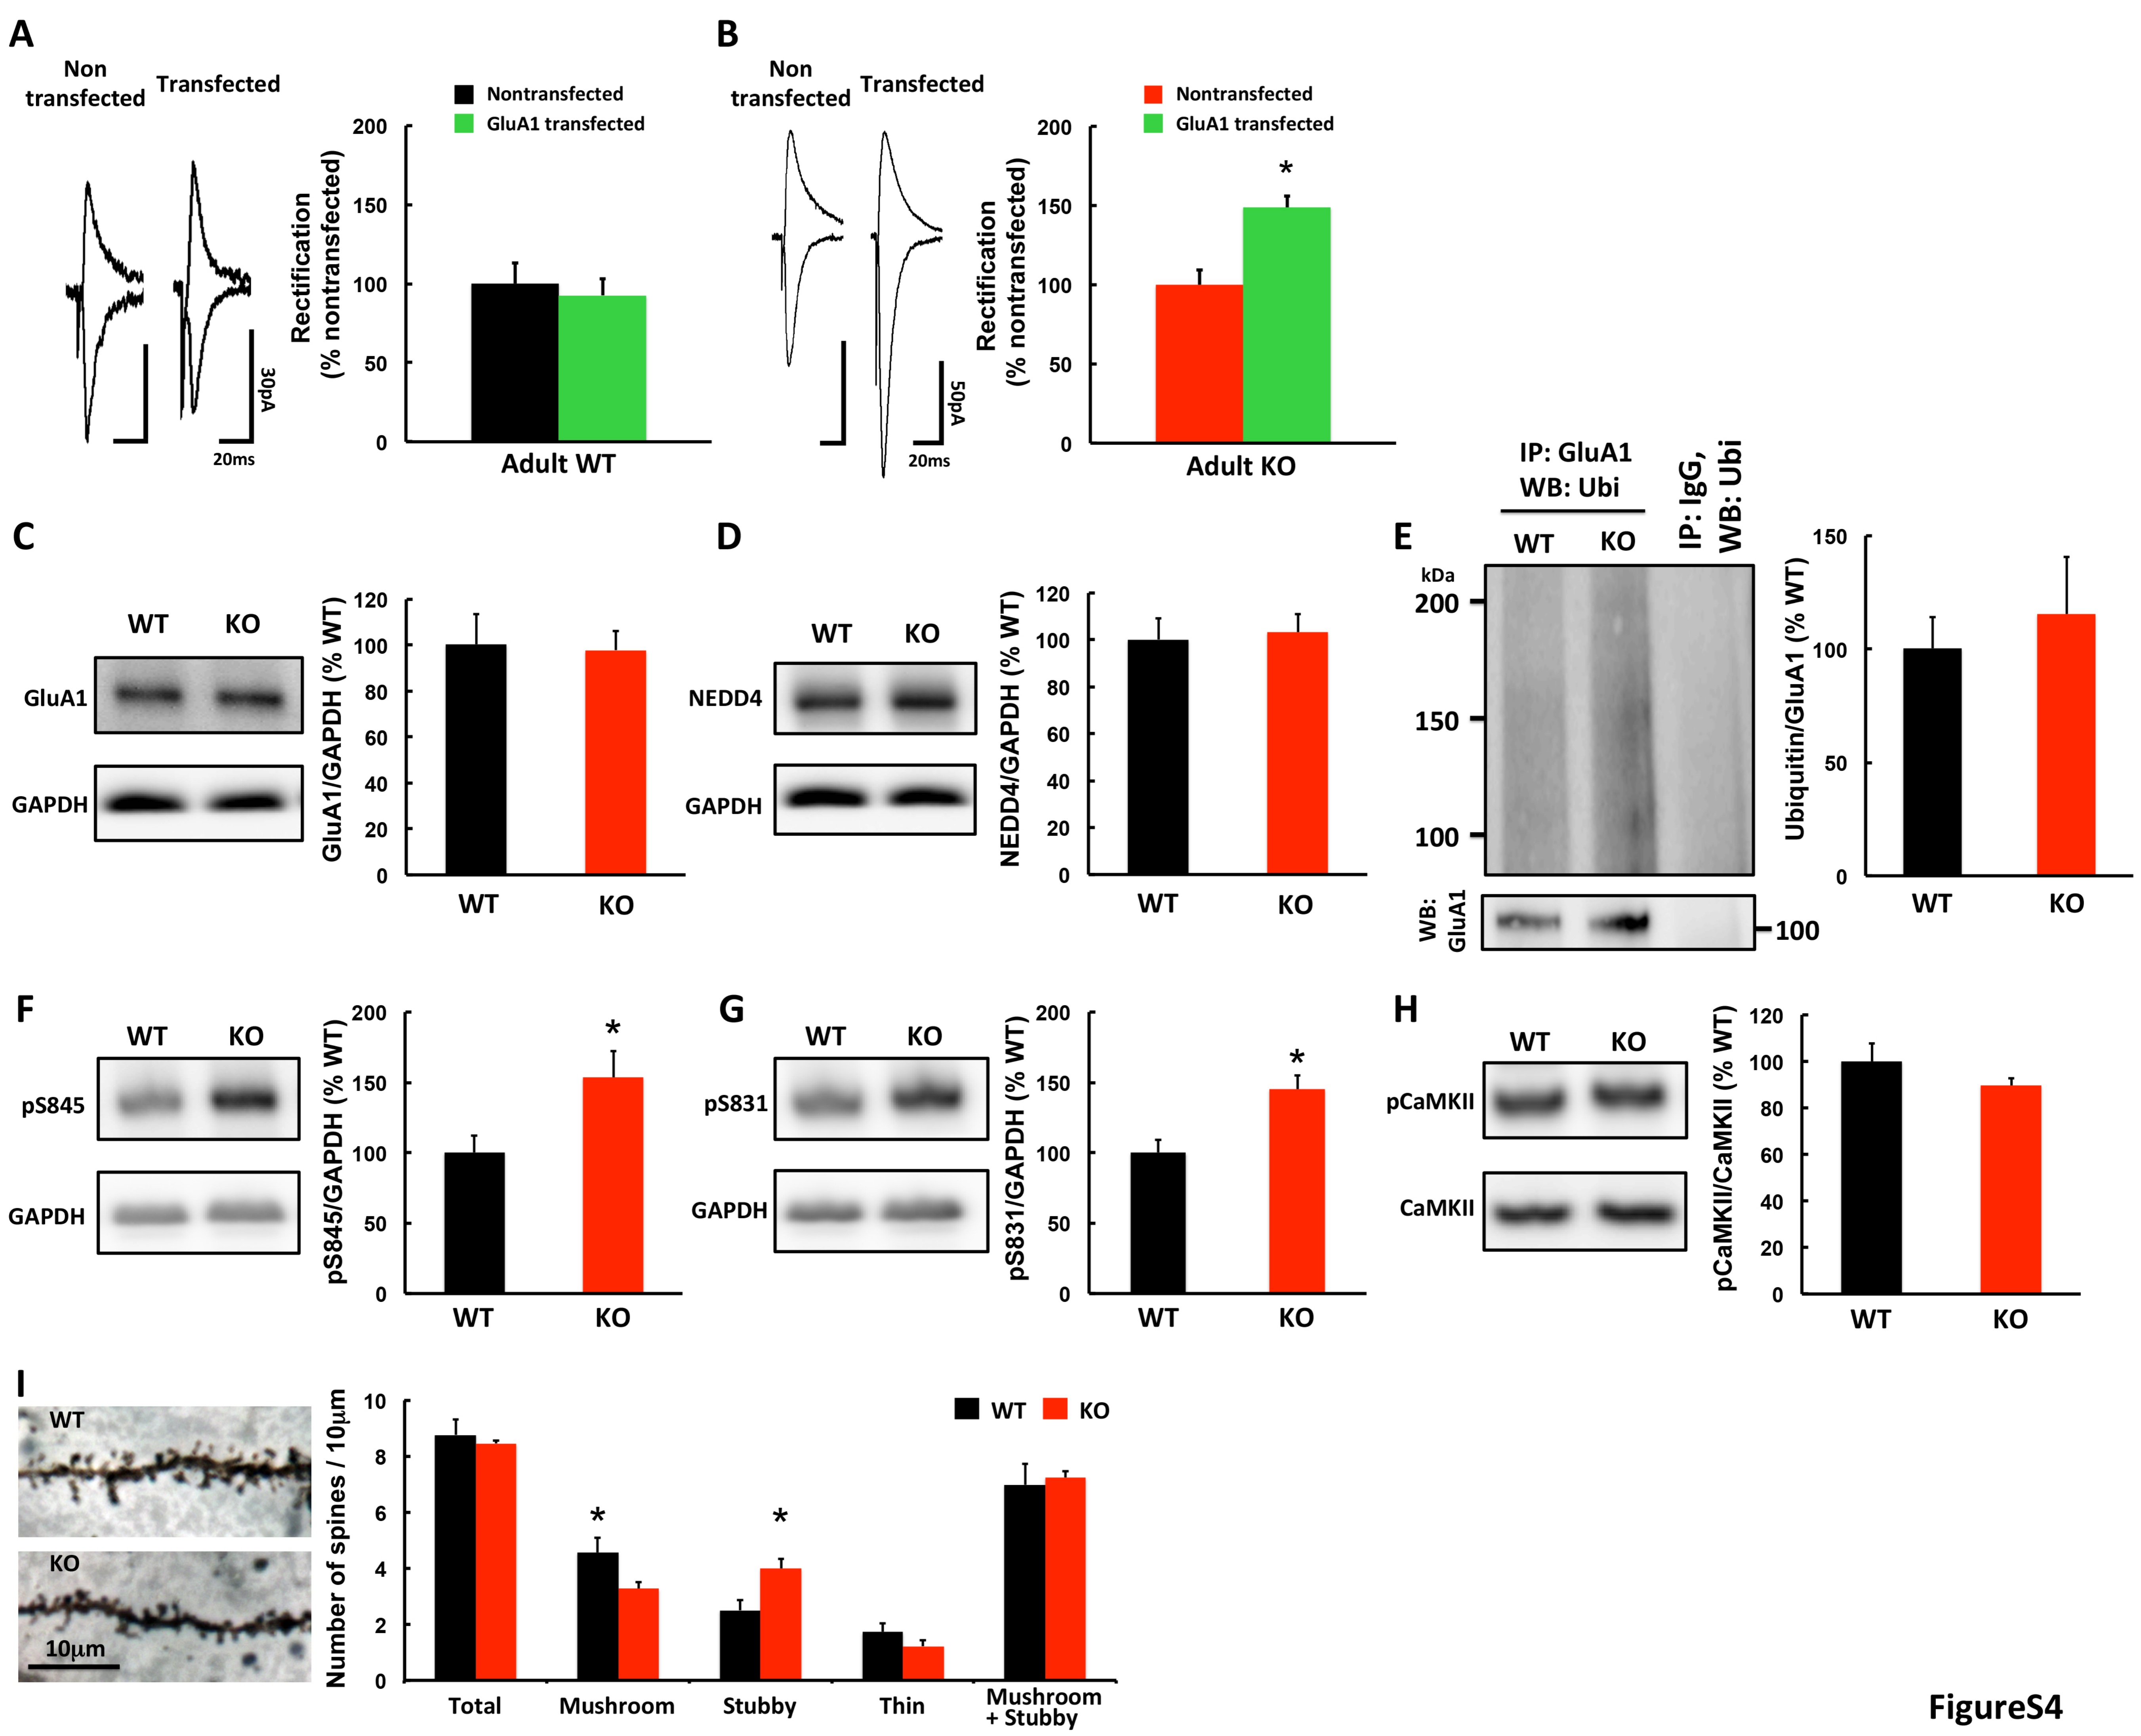

Supplement: supp_bhv232_bhv232supp_figs.pdf [file supp_bhv232_bhv232supp_figs.pdf]
